# Supplementary material for: Catalytic transfer hydrogenation of levulinic acid to gamma-valerolactone over a zirconium-based FDCA hybrid: insights into the effect of heteropoly acids
Source: Royal Society of Chemistry journal article supplement (doi:10.1039/d3se00434a), 2023-01-01
Supplement: d3se00434a1.pdf [file d3se00434a1.pdf]

## Supporting Information

for

### **Catalytic transfer hydrogenation of levulinic acid to gamma-valerolactone over zirconium-based FDCA hybrid: Insights into the effect of heteropoly acid**

Rulu Huang, Yuan Cheng, Huai Liu\*, Lincai Peng, Junhua Zhang\*

Faculty of Chemical Engineering, Kunming University of Science and Technology,  
No.727 South Jingming Road, Chenggong District, Kunming, 650500, Yunnan, China

\*Corresponding author.

E-mail address: [ankelliu@sina.com](mailto:ankelliu@sina.com) (H. Liu); [zhangjh@kust.edu.cn](mailto:zhangjh@kust.edu.cn) (J. Zhang)

Contents:

1. Supplementary Figures
2. Supplementary Tables

## 1. Supplementary Figures

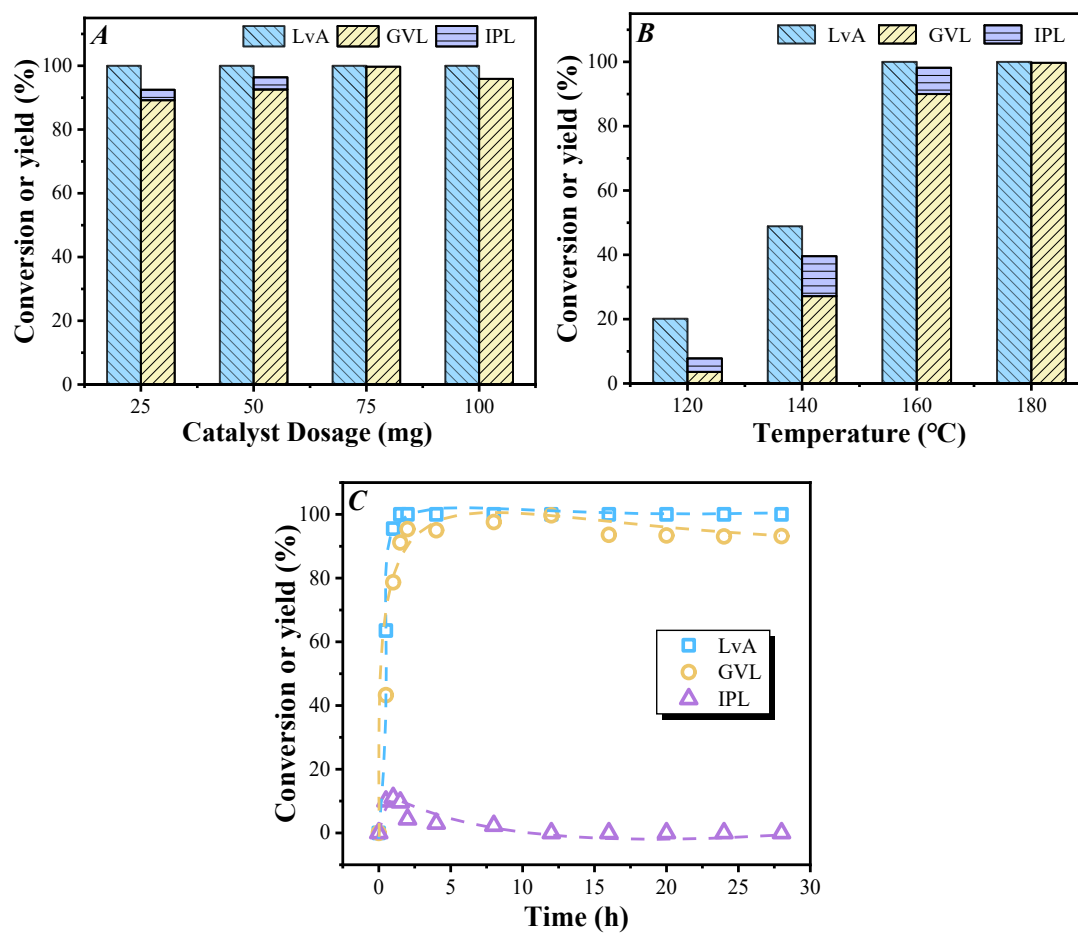

**Figure. S1.** Effect of the catalyst dosage (A), reaction temperature (B) and time (C) on CTH of LvA to GVL with Zr-FDCA-15HPWO. (Reaction conditions: 2 mmol LvA, 20 mL 2-propanol, 75 mg catalyst.)

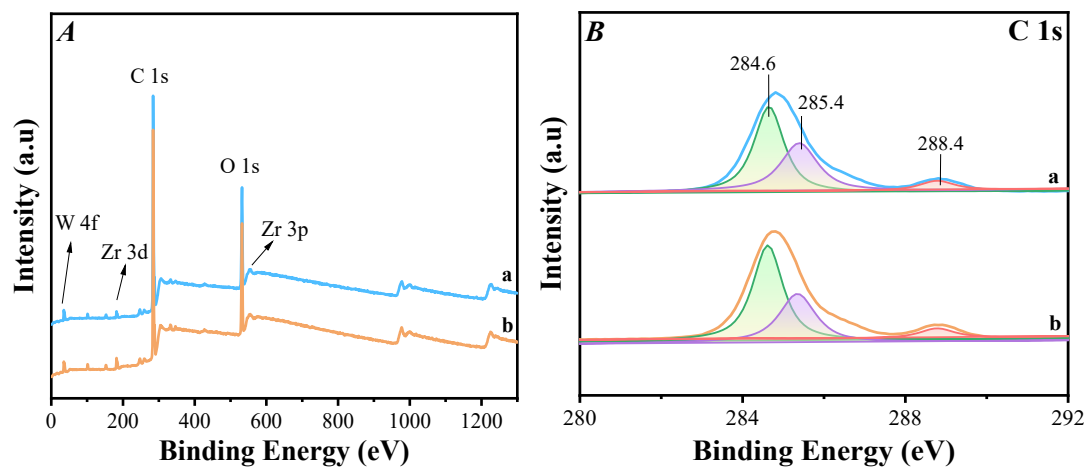

**Figure S2.** XPS survey scan (A) and high resolution XPS spectra for C 1s (B) of fresh (a) and recycled (b) Zr-FDCA-15HPWO after five runs.

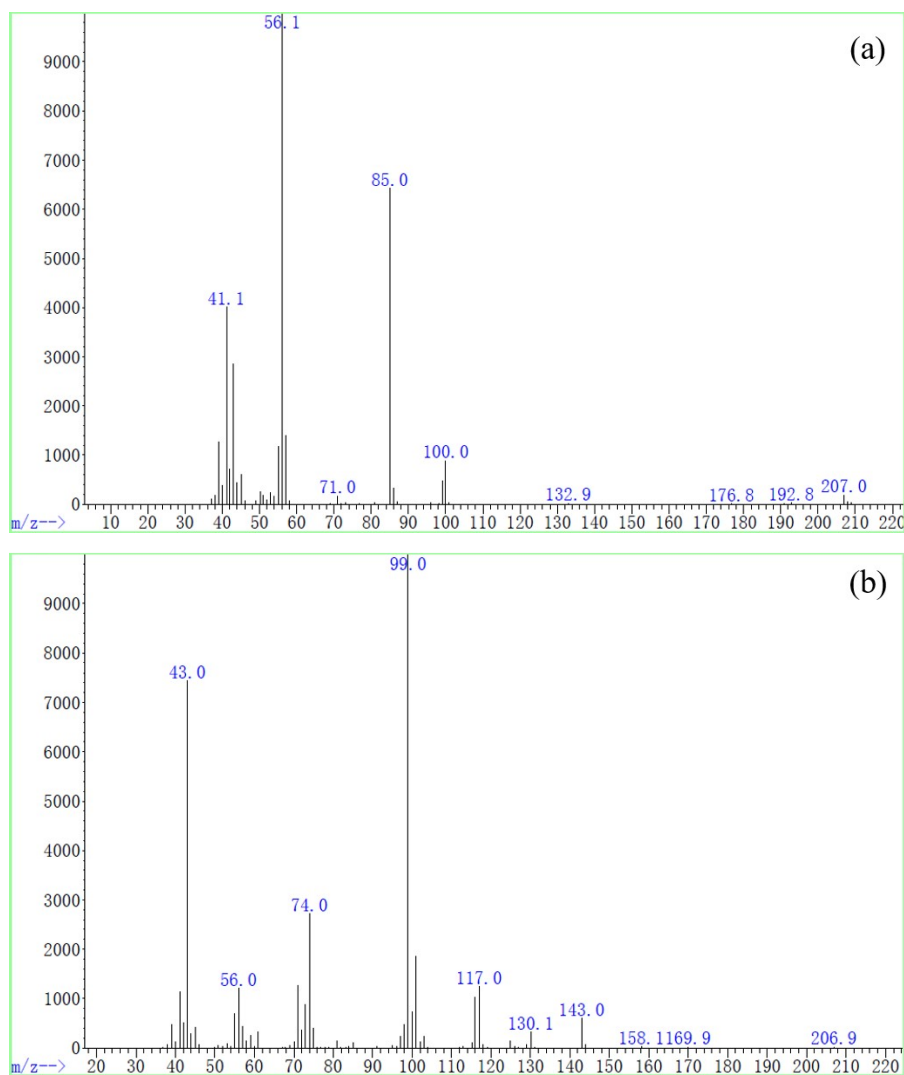

**Figure S3.** GC-MS spectra of GVL (a) and IPL (b) in 2-propanol.

## 2. Supplementary Tables

**Table S1.** Pore properties of various catalysts

| Entry | Catalysts                   | $S_{\text{BET}}^{\text{a}}$<br>( $\text{m}^2/\text{g}$ ) | $V_{\text{pore}}^{\text{b}}$<br>( $\text{cm}^3/\text{g}$ ) | $D_{\text{pore}}^{\text{c}}$<br>(nm) |
|-------|-----------------------------|----------------------------------------------------------|------------------------------------------------------------|--------------------------------------|
| 1     | HPWO                        | 7.48                                                     | 0.019                                                      | 7.85                                 |
| 2     | Zr-FDCA-15HPWO              | 6.82                                                     | 0.012                                                      | 6.71                                 |
| 3     | Zr-FDCA-15HPWO <sup>d</sup> | 2.18                                                     | 0.004                                                      | 6.99                                 |

<sup>a</sup> BET surface area was obtained from  $\text{N}_2$  adsorption isotherm; <sup>b</sup> volume of pores was estimated from BJH adsorption cumulative volume of pores; <sup>c</sup> average pore size was estimated from the adsorption; <sup>d</sup> recycled Zr-FDCA-15HPWO after five runs.

**Table S2.** BA and LA properties of fresh and recycled Zr-FDCA-15HPWO

| Entry | Temperature<br>(°C) | Catalysts | $C_{BA}^a$<br>( $\mu\text{mol/g}$ ) | $C_{LA}^a$<br>( $\mu\text{mol/g}$ ) | Total <sup>b</sup><br>( $\mu\text{mol/g}$ ) |
|-------|---------------------|-----------|-------------------------------------|-------------------------------------|---------------------------------------------|
| 1     | 200                 | fresh     | 7.55                                | 55.02                               | 62.57                                       |
|       |                     | recycled  | 6.09                                | 39.45                               | 45.54                                       |
| 2     | 350                 | fresh     | 5.13                                | 34.07                               | 39.21                                       |
|       |                     | recycled  | 3.54                                | 21.78                               | 25.32                                       |

<sup>a</sup> BA and LA were determined by Py-FTIR; <sup>b</sup> the sum of  $C_{BA}$  and  $C_{LA}$ .
